# Supplementary material for: Follistatin-like protein 1 functions as a potential target of gene therapy in proliferative diabetic retinopathy
Source: publisher site journal article supplement (doi:10.18632/aging.202678), 2021-03-10
Supplement: Supplementary file [file aging-v13i6-202678-supplementary-material-SD2.pdf]

## SUPPLEMENTARY TABLE

**Supplementary Table 1. Sequencing quality assessment.**

| <b>Groups</b>         | <b>Original reads</b> | <b>Clean reads</b> | <b>Total basepairs</b> | <b>Q20(%)</b> | <b>GC(%)</b> |
|-----------------------|-----------------------|--------------------|------------------------|---------------|--------------|
| HG+LU group           | 49120614              | 46057708           | 6908656200             | 97.78         | 48.17        |
| V+LU group            | 49120350              | 46047754           | 6907163100             | 97.83         | 48.28        |
| HG+LU+anti-CTGF group | 49120360              | 46211118           | 6931667700             | 97.72         | 48.49        |

Mass analysis indicated that the total number of reads in the HG+Lu group, VEGF+Lu group, and HG+Lu+anti-CTGF group were 49120614, 49120350, and 49120360, respectively. Clean read proportions were 93.76%, 93.74%, and 94.08%, respectively. Among these, the proportions of Q20 (%) and GC (%) were 97.78 and 48.17 in the HG+Lu group, respectively, 97.72 and 48.49 in the VEGF+Lu group, respectively, and 97.83 and 48.28 in the HG+Lu+anti-CTGF group, respectively.
